# Supplementary material
Source: Royal Society of Chemistry journal article supplement (doi:10.1039/d6se00009f)
Supplement: d6se00009f1.pdf [file d6se00009f1.pdf]

## Supplementary Material

**Table S1.** Average chemical composition of corrosion reaction products formed on the metal surfaces of the positive battery pole.

| Experiment          | Measurement location | Composition of the corrosion products /wt% |           |           |           |          |          |          |           |           |
|---------------------|----------------------|--------------------------------------------|-----------|-----------|-----------|----------|----------|----------|-----------|-----------|
|                     |                      | Fe                                         | Ni        | Al        | O         | P        | Si       | Cl       | Na        |           |
| 0.15 m NaCl         | Oxide on steel       | Average                                    | 66,30     | 3,82      | 0,99      | 29,98    | 0,26     | 0,17     | 0,33      | 1,55      |
|                     |                      | Std Dev                                    | 4,90      | 1,80      | 0,62      | 4,81     | 0,15     | 0,26     | 0,42      | 0,67      |
|                     | Oxide on Al          |                                            | <b>Fe</b> | <b>Ni</b> | <b>Al</b> | <b>O</b> | <b>P</b> | <b>F</b> | <b>Cl</b> |           |
|                     |                      | Average                                    | 1,74      | 1,17      | 38,89     | 44,15    | 7,55     | 7,44     | 1,70      |           |
|                     |                      | Std Dev                                    | 2,27      | 0,36      | 5,42      | 7,12     | 3,29     | 4,72     | 1,39      |           |
|                     |                      |                                            |           |           |           |          |          |          |           |           |
| 1 m NaCl<br>100 min | Deposit on steel     |                                            | <b>Fe</b> | <b>Ni</b> | <b>Al</b> | <b>O</b> | <b>P</b> | <b>F</b> | <b>Cl</b> | <b>Na</b> |
|                     |                      | Average                                    | 0,98      | 0,47      | 11,29     | 8,54     | 4,93     | 9,52     | 0,98      | 0,18      |
|                     |                      | Std Dev                                    | 1,26      | 0,29      | 4,21      | 2,46     | 1,86     | 4,66     | 0,77      | 0,11      |
| 1 m NaCl<br>180 min | Deposit on steel     |                                            | <b>Fe</b> | <b>Ni</b> | <b>Al</b> | <b>O</b> | <b>P</b> | <b>F</b> | <b>Cl</b> | <b>Na</b> |
|                     |                      | Average                                    | 13,86     | 1,01      | 3,07      | 9,05     | 5,44     | 10,24    | 3,10      | 0,21      |
|                     |                      | Std Dev                                    | 3,48      | 0,15      | 1,49      | 4,74     | 1,57     | 2,25     | 1,82      | 0,08      |
|                     | Deposit on Al        |                                            | <b>Fe</b> | <b>Ni</b> | <b>Al</b> | <b>O</b> | <b>P</b> | <b>F</b> | <b>Cl</b> | <b>Na</b> |
|                     |                      | Average                                    | 0,60      | 0,49      | 11,04     | 10,19    | 4,53     | 11,87    | 0,62      | 0,46      |
|                     |                      | Std Dev                                    | 0,22      | 0,22      | 4,10      | 3,52     | 0,82     | 3,03     | 0,22      | 0,21      |
|                     |                      |                                            |           |           |           |          |          |          |           |           |
| Precipitate         | NaCl crystals        |                                            | <b>Fe</b> |           | <b>Al</b> | <b>O</b> |          | <b>F</b> | <b>Cl</b> | <b>Na</b> |
|                     |                      | Average                                    | 1,78      |           | 0,73      | 5,07     |          | 0,73     | 56,85     | 36,62     |
|                     |                      | Std Dev                                    | 2,21      |           | 0,97      | 3,34     |          | 0,26     | 4,47      | 3,63      |
|                     | Oxide particles      |                                            | <b>Fe</b> | <b>Ni</b> | <b>Al</b> | <b>O</b> |          |          | <b>Cl</b> | <b>Na</b> |
|                     |                      | Average                                    | 39,59     | 2,06      | 11,00     | 31,95    |          |          | 10,21     | 6,45      |
|                     |                      | Std dev                                    | 11,21     | 0,27      | 3,32      | 7,79     |          |          | 5,27      | 3,48      |
|                     | Al(OH) <sub>3</sub>  |                                            | <b>Fe</b> |           | <b>Al</b> | <b>O</b> |          |          | <b>Cl</b> |           |
|                     |                      | Average                                    | 2,67      |           | 34,91     | 61,15    |          |          | 1,26      |           |

**Table S2.** Average chemical composition of corrosion reaction products formed on the metal surfaces of the positive battery pole in the electrolyte solution during discharging in NaCl + ZnSO<sub>4</sub> and NaCl + ZnCl<sub>2</sub> solutions.

| Experiment                            | Measurement location      | Composition of the corrosion products / wt% |          |           |           |           |           |           |           |           |           |
|---------------------------------------|---------------------------|---------------------------------------------|----------|-----------|-----------|-----------|-----------|-----------|-----------|-----------|-----------|
|                                       |                           | O                                           | F        | Al        | Si        | P         | S         | Cl        | Fe        | Zn        |           |
| 1 m NaCl +<br>0.3 m ZnSO <sub>4</sub> | oxide on steel            |                                             | <b>O</b> | <b>F</b>  | <b>Al</b> | <b>Si</b> | <b>P</b>  | <b>S</b>  | <b>Cl</b> | <b>Fe</b> | <b>Zn</b> |
|                                       |                           | Average                                     | 24,21    | 10,10     | 1,99      | 0,69      | 1,18      | 2,27      | 1,10      | 43,94     | 18,35     |
|                                       |                           | StDev                                       | 4,85     | 3,81      | 0,79      | 0,45      | 0,53      | 0,88      | 0,28      | 5,21      | 8,53      |
|                                       | Oxide on Al               |                                             | <b>O</b> | <b>F</b>  | <b>Al</b> | <b>S</b>  | <b>Cl</b> | <b>Fe</b> | <b>Zn</b> |           |           |
|                                       |                           | Average                                     | 55,34    | 4,94      | 29,41     | 4,97      | 3,55      | 1,00      | 1,28      |           |           |
|                                       |                           | StDev                                       | 11,03    | 6,55      | 2,44      | 1,50      | 2,20      | 1,07      | 0,97      |           |           |
|                                       | Particles in the solution |                                             | <b>O</b> | <b>Al</b> | <b>S</b>  | <b>Cl</b> | <b>Fe</b> | <b>Ni</b> | <b>Zn</b> |           |           |
|                                       |                           | Average                                     | 7,65     | 1,29      | 0,33      |           |           |           | 89,47     |           |           |

|                      |                             |          |           |           |           |           |           |           |           |           |
|----------------------|-----------------------------|----------|-----------|-----------|-----------|-----------|-----------|-----------|-----------|-----------|
|                      | StDev                       | 1,42     | 0,33      | 0,11      |           |           |           |           | 1,68      |           |
|                      | <b>ZnO particles</b>        | <b>O</b> | <b>Al</b> | <b>S</b>  | <b>Cl</b> | <b>Fe</b> | <b>Ni</b> | <b>Zn</b> |           |           |
|                      | Average                     | 16,19    | 3,03      | 1,69      | 0,19      |           |           |           | 78,49     |           |
|                      | StDev                       | 3,69     | 3,71      | 0,93      | 0,14      |           |           |           | 4,50      |           |
| 3 m NaCl 2.5 m ZnSO4 | <b>Deposit on the steel</b> | <b>O</b> | <b>F</b>  | <b>Si</b> | <b>S</b>  | <b>Cl</b> | <b>Fe</b> | <b>Ni</b> | <b>Zn</b> |           |
|                      | Average                     | 13,78    | 1,26      | 0,21      | 5,92      | 2,74      | 3,59      | 1,25      | 71,82     |           |
|                      | StDev                       | 3,59     | 0,57      | 0,08      | 1,95      | 0,86      | 4,41      | 1,22      | 4,18      |           |
|                      | <b>Zn particles</b>         | <b>O</b> | <b>Al</b> | <b>Si</b> | <b>Fe</b> | <b>Ni</b> | <b>Zn</b> |           |           |           |
|                      | Average                     | 1,27     | 0,46      | 0,22      | 0,26      | 0,44      | 97,96     |           |           |           |
|                      | StDev                       | 0,99     | 0,05      | 0,05      | 0,09      | 0,23      | 0,78      |           |           |           |
|                      | <b>ZnO particles</b>        | <b>O</b> | <b>F</b>  | <b>Al</b> | <b>Si</b> | <b>S</b>  | <b>Cl</b> | <b>Fe</b> | <b>Ni</b> | <b>Zn</b> |
|                      | Average                     | 15,56    | 0,82      | 5,80      | 0,26      | 4,40      | 2,48      | 1,15      | 0,67      | 73,85     |
|                      | StDev                       | 2,82     | 0,85      | 1,69      | 0,09      | 1,75      | 1,05      | 0,78      | 0,47      | 4,71      |

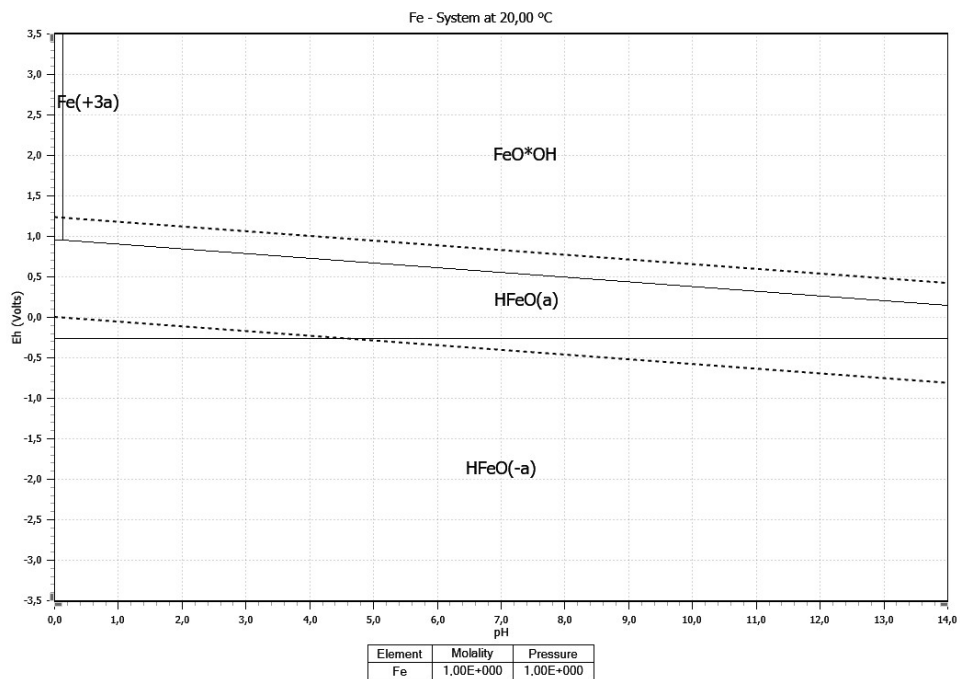

Figure S1. Pourbaix Diagram of Iron drawn with HSC Chemistry.

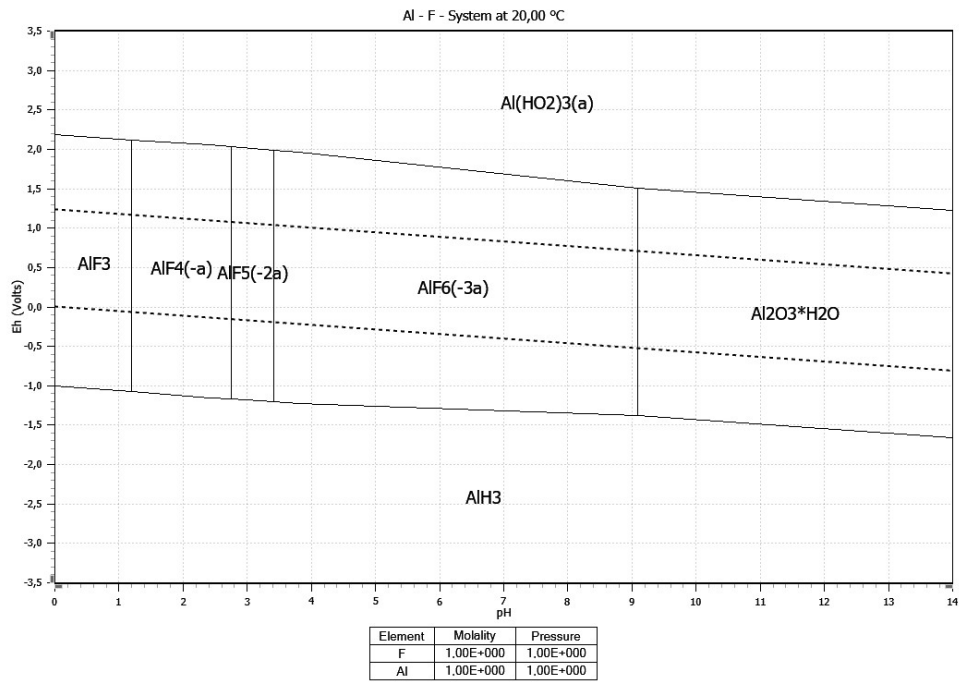

**Figure S2.** Pourbaix diagram of the Aluminium-fluorine system drawn with HSC Chemistry.

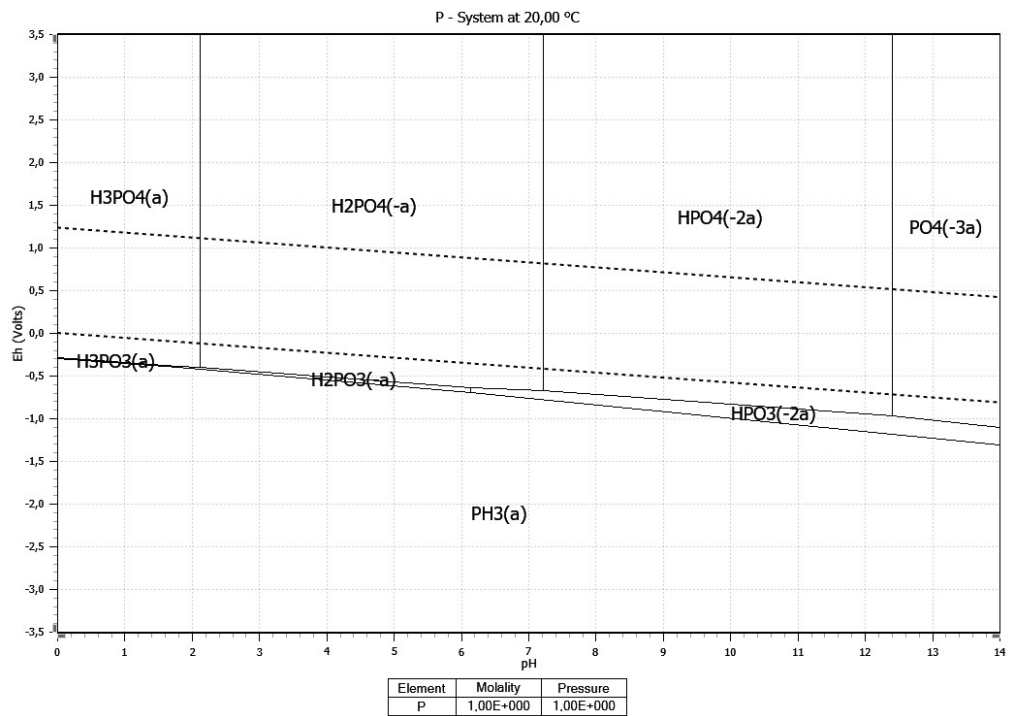

**Figure S3.** Pourbaix diagram of phosphorous drawn with HSC Chemistry.

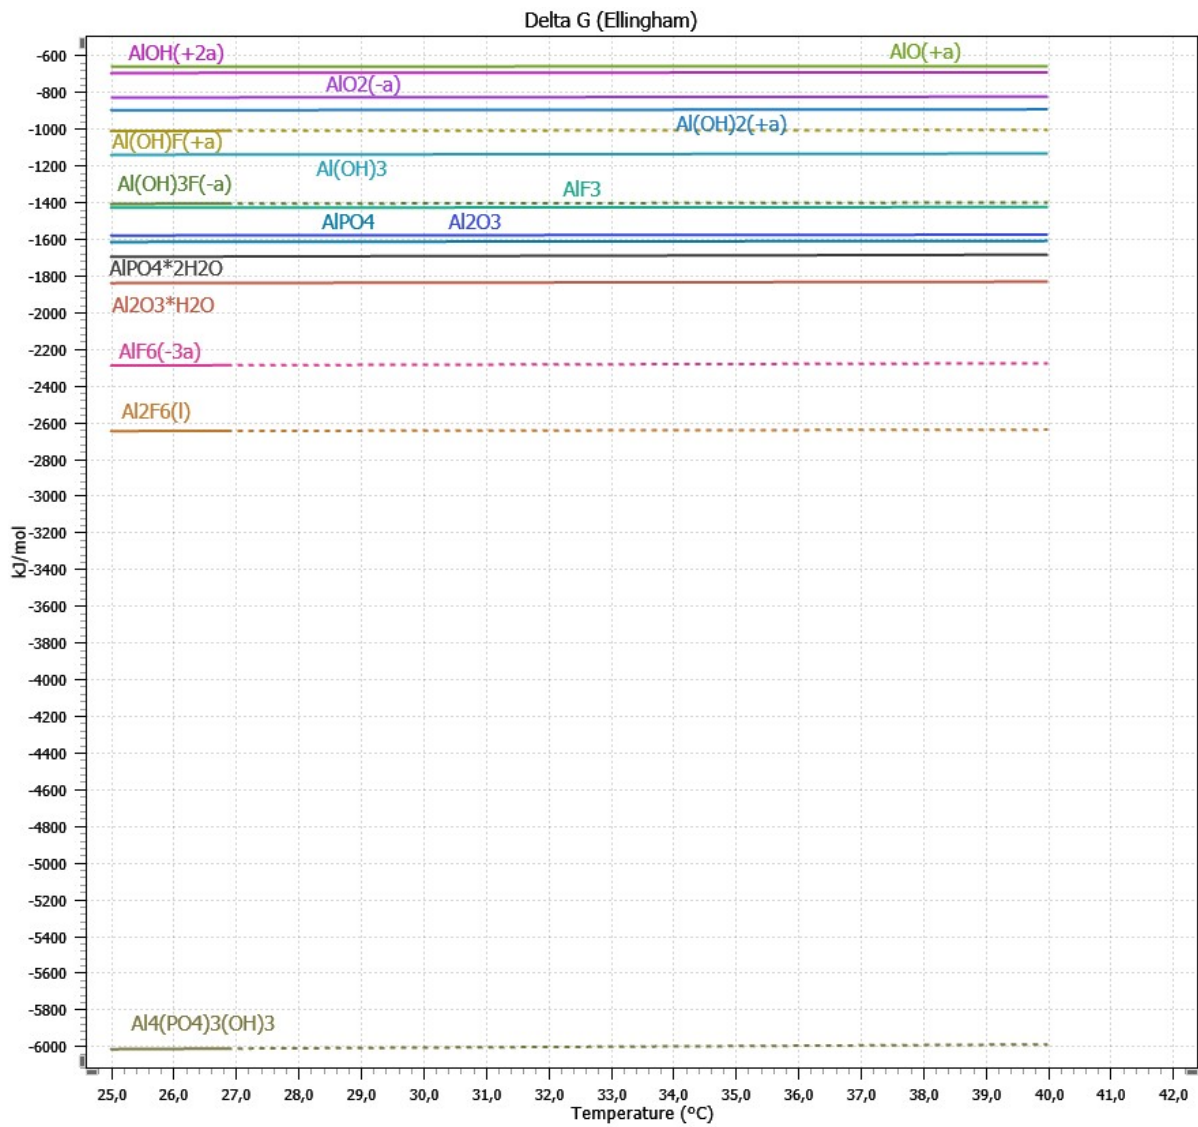

**Figure S4.** Reaction Gibbs energies of the Al-O-H-F-P- system.

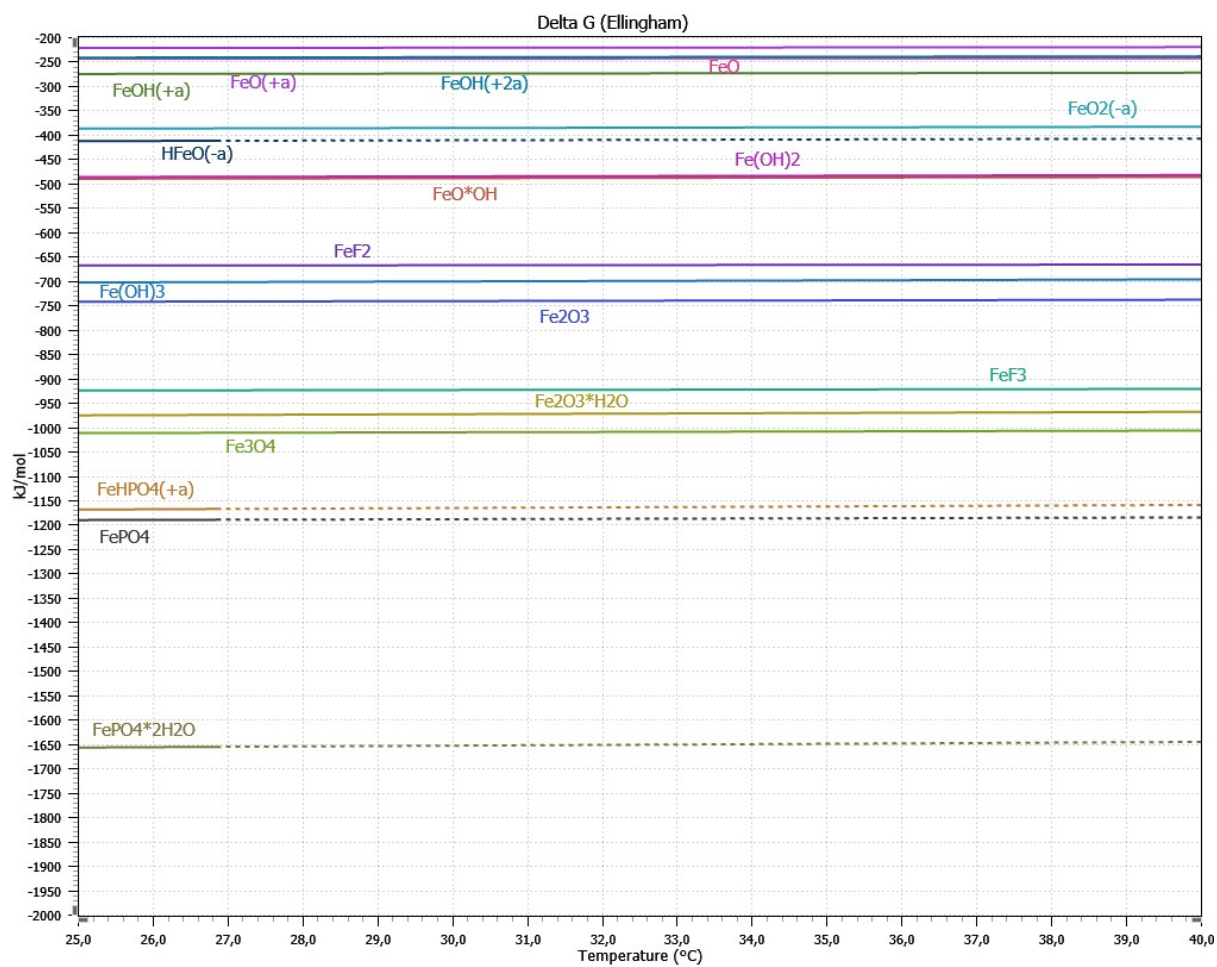

**Figure S5.** Reaction Gibbs energies of the Fe-O-H-F-P- system.

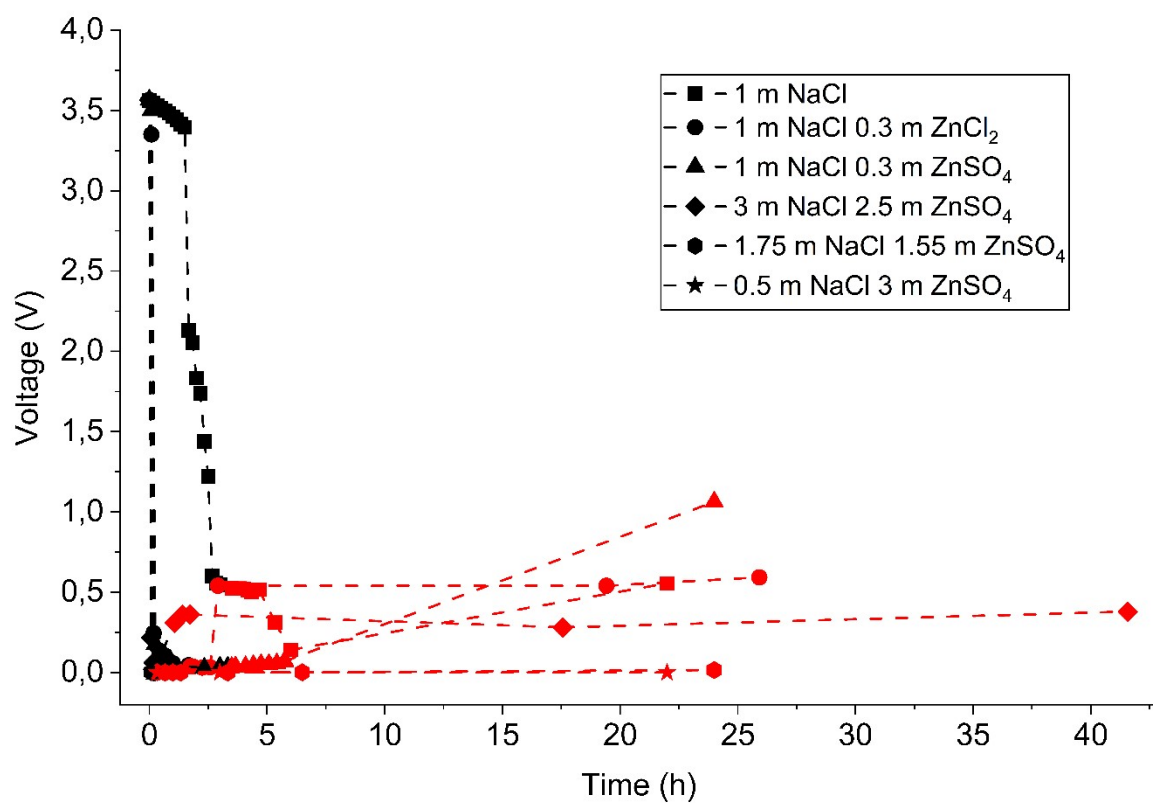

Figure S6. Discharging rate of LIBs in electrolyte solutions with different NaCl and ZnSO<sub>4</sub> concentrations. Red datapoints represent voltage relaxation behaviour after the discharging experiments.
